# Supplementary material for: A year in the life of a central California kelp forest: physical and biological insights into biogeochemical variability
Source: Copernicus journal article supplement (doi:10.5194/bg-14-31-2017), 2017-01-05
Supplement: Supplementary file [file bg-14-31-2017-supplement-title-page.pdf › bg-14-31-2017-supplement-title-page.pdf]

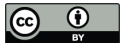

## *Supplement of*

# **A year in the life of a central California kelp forest: physical and biological insights into biogeochemical variability**

**David A. Kowee et al.**

*Correspondence to:* David A. Kowee ([dkowee@carnegiescience.edu](mailto:dkowee@carnegiescience.edu))

- [bg-14-31-2017-supplement-title-page.pdf](#)
- Kowee et al KFB HMS Supplement 12Dec2016
  - Kowee et al KFB HMS SI Biogeosciences R1.docx
  - Kowee\_et\_al\_HMS\_KFB\_data.txt

The copyright of individual parts of the supplement might differ from the CC-BY 3.0 licence.
